# Supplementary material
Source: PubMed Central journal article supplement (PMC2798678)
Supplement: JCI38388sd.pdf [file JCI38388sd.pdf]

## Supplemental Figure 1

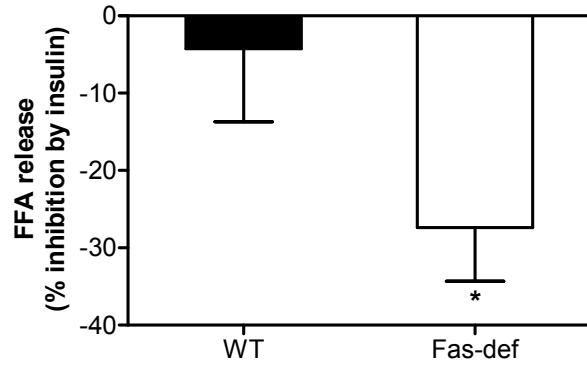

### **Insulin significantly reduces FFA release from adipocytes isolated from HFD-fed Fas-def mice**

Effect of insulin on FFA release from isolated perigonadal adipocytes of HFD-fed WT and Fas-def mice was determined. Results represent the mean  $\pm$  SEM of 4-5 experiments. \* $p < 0.05$  (one sample  $t$  test).

## Supplemental Figure 2

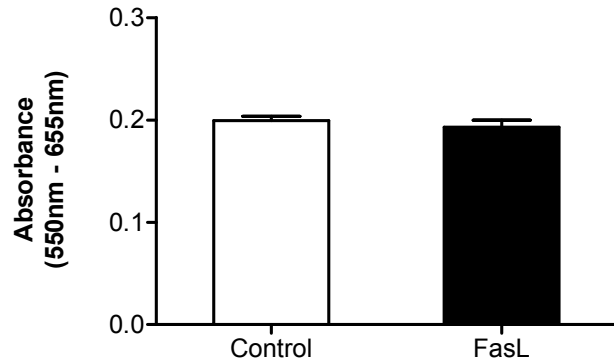

### **Fas-ligation for 12 hours does not affect viability of 3T3-L1 adipocytes**

Mature 3T3-L1 adipocytes were incubated for 12 hours with 2ng/ml FasL. Thereafter, cells were incubated with MTT. Salt was extracted from the cells with DMSO. The amount of yellow MTT reduced to purple formazan was measured spectrophotometrically. Results are the mean  $\pm$  SEM of 3 independent experiments.

## Supplemental Figure 3

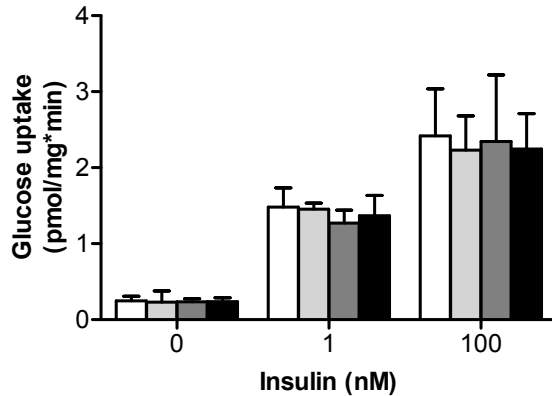

### **Lower FasL concentrations (up to 1 ng/ml) did not reduce insulin-stimulated glucose uptake in 3T3-L1 adipocytes**

Mature 3T3-L1 adipocytes were incubated without (white bars) or in the presence of 0.05 (light grey bars), 0.2 (dark grey bars) or 1 (black bars) ng/ml FasL for 12 hours. 2-deoxy-<sup>3</sup>H-D-glucose (<sup>3</sup>H-2dG) glucose uptake was determined after treatment with or without insulin (1nM or 100 nM). Shown are absolute values of <sup>3</sup>H-2dG uptake in untreated or FasL-treated 3T3-L1 adipocytes. Results are the mean  $\pm$  SEM of 3 independent experiments.

## Supplemental Figure 4

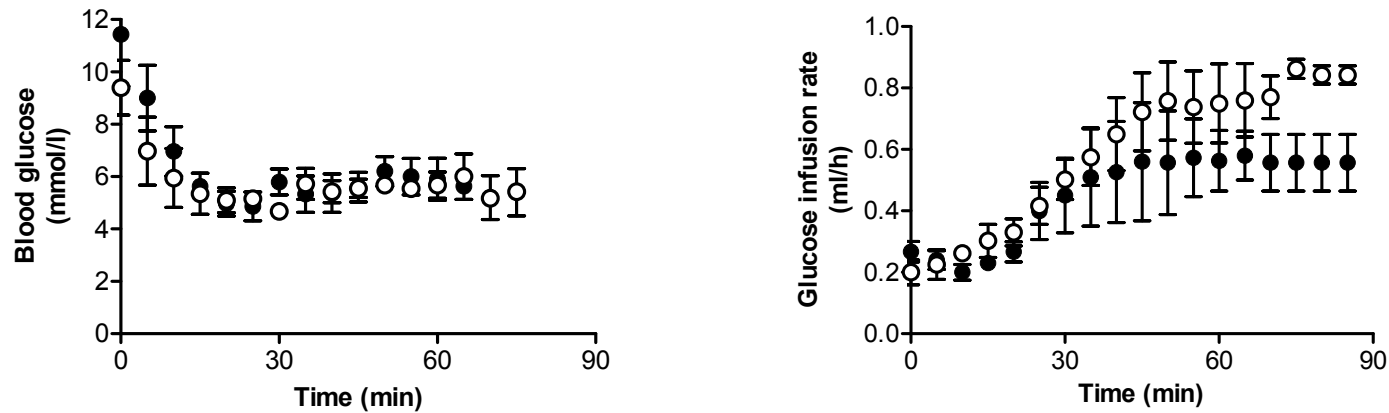

### Blood glucose concentrations and glucose infusion rate during hyperinsulinemic-euglycemic clamp

Blood glucose levels were clamped upon insulin infusion between 5 and 6 mmol/l in both WT (●) and AFasKO (○) mice (left graph). In order to maintain euglycemia, glucose infusion rate was adjusted over time (right graph).

## Supplemental Figure 5

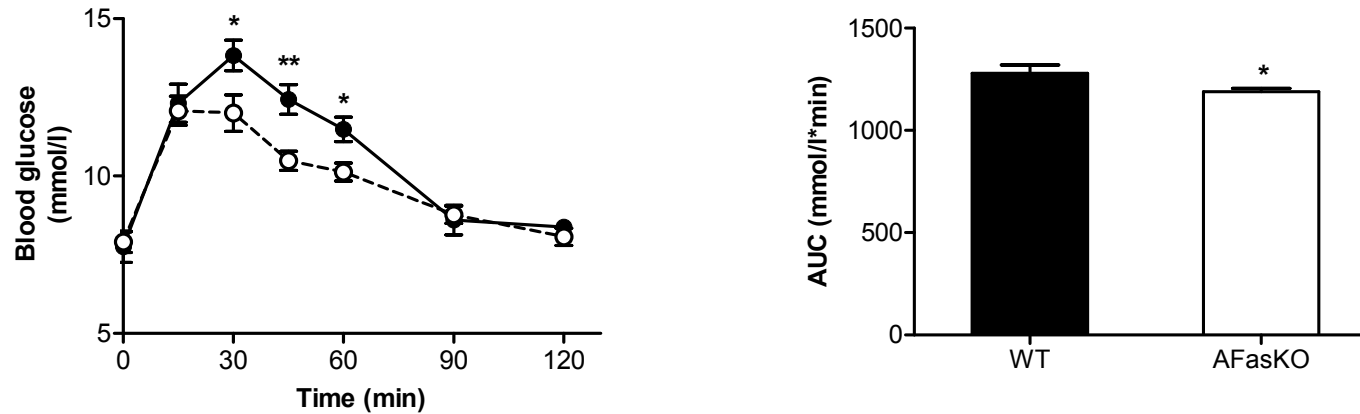

### Lower gluconeogenic flux in HFD-fed AFasKO mice

Intraperitoneal pyruvate tolerance test in wild-type (●) and AFasKO (○) mice (left graph). Pyruvate (2g/kg BW) was injected intraperitoneally and plasma glucose levels were detected at indicated time points. Right graph depicts the corresponding analysis of the area under the curve. Results are the means  $\pm$  SEM of 7 animals per group. \* $p < 0.05$ , \*\* $p < 0.01$  (Student's *t* test).

## Supplemental Figure 6

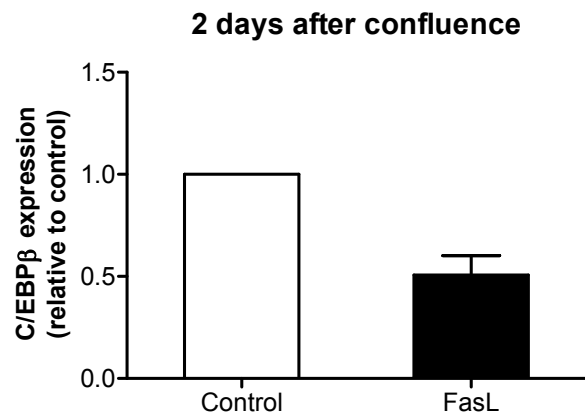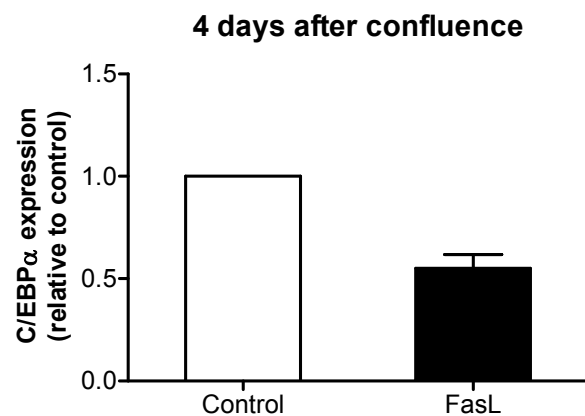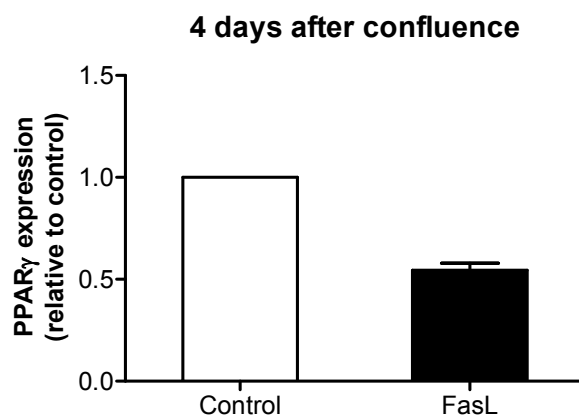

### **FasL treatment decreases expression of adipocyte differentiation markers**

After reaching confluence, 3T3-L1 preadipocytes were incubated with or without 2ng/ml FasL. Differentiation was induced 48 hours later with isobutylmethylxanthine (IBMX), dexamethasone, insulin and rosiglitazone. Total cell lysates were resolved by LDS-PAGE and immunoblotted with anti-C/EBP $\beta$ , anti-C/EBP $\alpha$  or anti-PPAR $\gamma$  antibody. Results are the mean  $\pm$  SEM of 2-3 independent experiments.

## Supplemental Figure 7

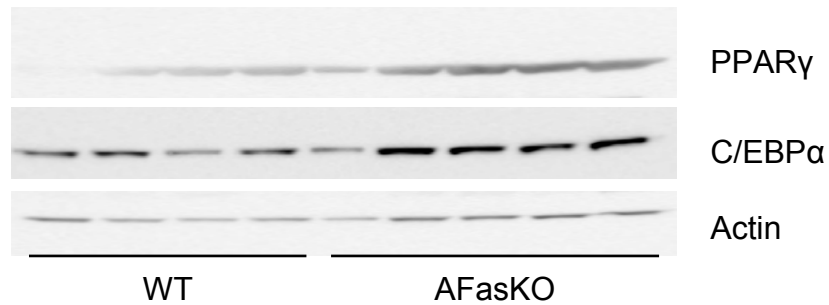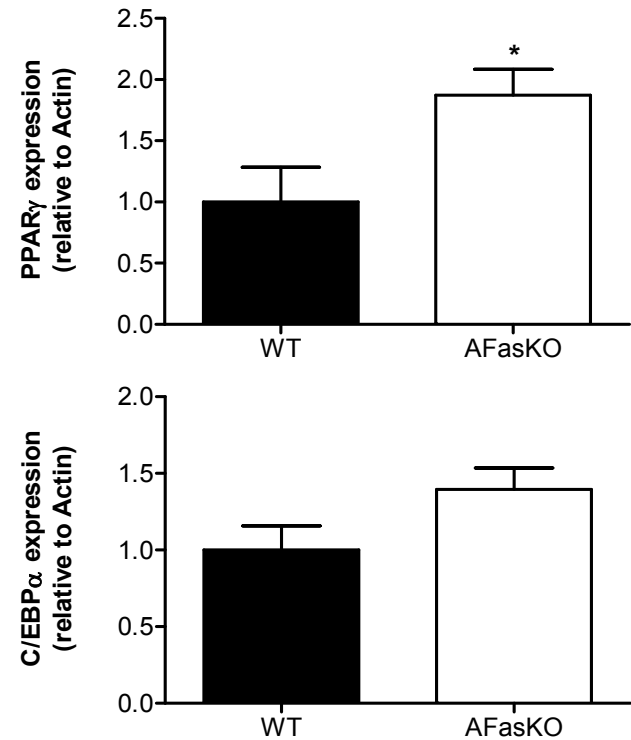

### PPAR $\gamma$ and C/EBP $\alpha$ expression is increased in WAT of HFD-fed AFasKO mice

Total lysates were prepared from inguinal fat pads harvested from HFD-fed wild-type and AFasKO mice, resolved by LDS-PAGE and immunoblotted with anti-C/EBP $\alpha$ , anti-PPAR $\gamma$  or anti-actin antibody. Results are the mean  $\pm$  SEM of 4-5 mice per group. \* $p < 0.05$  (Student's t test).

## Supplemental Figure 8

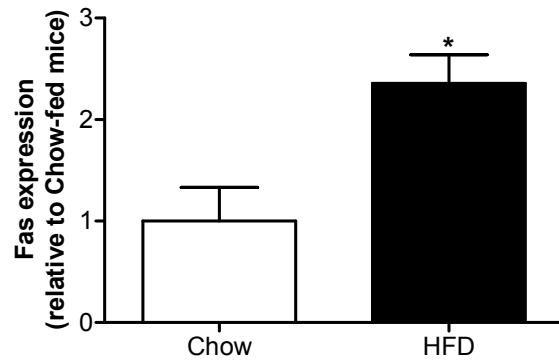

### **Increased Fas-expression in adipocytes of wildtype mice after 4 days of HFD**

Total cell lysates were prepared from isolated perigonadal adipocytes harvested from wild-type C57Bl6/J mice fed either chow-diet or HFD for 4 days. Lysates were resolved by LDS-PAGE and immunoblotted with anti-Fas antibody. Results are the mean  $\pm$  SEM of 3-5 mice per group. \* $p < 0.05$  (Student's *t* test).



## Supplemental Figure 9

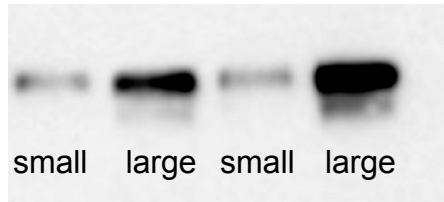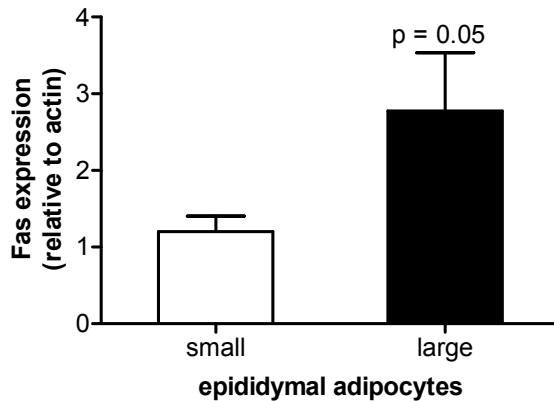

### **Fas expression is increased in large adipocytes**

Wildtype C57Bl6/J mice were fed a HFD for 8 weeks. Adipocytes were harvested from perigonadal fat pads and separated according to their size as described elsewhere<sup>1</sup>. Total cell lysates were resolved by LDS-PAGE and immunoblotted with anti-Fas or anti-actin antibody. A representative immunoblot is shown. Results are the mean  $\pm$  SEM of 4 independent experiments and are normalized to actin expression.

<sup>1</sup> Wueest, S., Rapold, R.A., Rytka, J.M., Schoenle, E.J., and Konrad, D. 2009. Basal lipolysis, not the degree of insulin resistance, differentiates large from small isolated adipocytes in high-fat fed mice. *Diabetologia* 52:541-546.

## Supplemental Figure 10

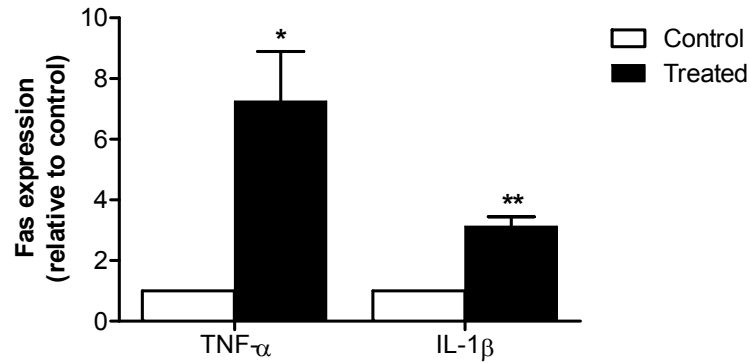

### **Fas expression is induced by pro-inflammatory cytokines in 3T3-L1 adipocytes**

Mature 3T3-L1 adipocytes were incubated with 5nM TNF- $\alpha$  or 20 ng/ml IL-1 $\beta$  for 12 hours. Total cell lysates were resolved by LDS-PAGE and immunoblotted with anti-Fas antibody. Results are the mean  $\pm$  SEM of 4 independent experiments and are expressed relative to untreated cells. \* $p < 0.05$ , \*\* $p < 0.01$  (One sample  $t$  test).

**Supplemental Table 1 Basic clinical characteristics of patients**

|                           | Lean (n=5) | Obese (n=10) | Obese and diabetic (n=9) |
|---------------------------|------------|--------------|--------------------------|
| Age (y)                   | 41.8 ± 2.3 | 36.2 ± 2.9   | 47.6 ± 3.5               |
| BMI (Kg/m <sup>2</sup> )  | 23.7 ± 0.5 | 41.5 ± 1.3   | 42.6 ± 0.6               |
| FPG (mg/dl)               | 89 ± 3     | 89 ± 3       | 187 ± 32                 |
| Fasting insulin (μU/ml)   | 8.9 ± 2.7  | 16.0 ± 2.6   | 14.8 ± 3.8               |
| HbA1C (%)                 | 5.3 ± 0.1  | 5.6 ± 0.1    | 7.8 ± 0.5                |
| Triglycerides (mg/dl)     | 116 ± 3    | 143 ± 21     | 230 ± 46                 |
| Total cholesterol (mg/dl) | 177 ± 5    | 199 ± 12     | 239 ± 16                 |
| AST (IU/L)                | n. d.      | 21.8 ± 2.9   | 34.4 ± 11.2              |
| ALT (IU/L)                | n. d.      | 21.5 ± 4.6   | 41.6 ± 16.3              |

n. d.: not determined

**Supplemental Table 2 mRNA expression in white adipose tissue of HFD-fed wild-type (WT) and AFasKO mice relative to WT**

|             | WT         | AFasKO         |
|-------------|------------|----------------|
| Adiponectin | 1.0 ± 0.06 | 1.12 ± 0.10    |
| PPAR_       | 1.0 ± 0.07 | 0.88 ± 0.09    |
| Resistin    | 1.0 ± 0.07 | 0.79 ± 0.07 *  |
| MCP-1       | 1.0 ± 0.10 | 0.69 ± 0.07 *  |
| IL-6        | 1.0 ± 0.09 | 0.70 ± 0.08 *  |
| IL-1_       | 1.0 ± 0.30 | 0.65 ± 0.07    |
| KC          | 1.0 ± 0.11 | 0.90 ± 0.09    |
| TNF-_       | 1.0 ± 0.08 | 0.89 ± 0.13    |
| CD11b       | 1.0 ± 0.06 | 0.63 ± 0.11 ** |
| IL-10       | 1.0 ± 0.18 | 3.24 ± 0.66 ** |
| Arginase 1  | 1.0 ± 0.10 | 1.89 ± 0.45    |

Results are the means ± SEM of five to nine independent experiments. \*p < 0.05, \*\*p < 0.01 (Student's *t* test).
